# Supplementary material for: Interaction of Consumer Heterogeneity and Technological Progress in the US Electric Vehicle Market
Source: MDPI journal article supplement (doi:10.3390/en15134722), 2022-06-28
Supplement: s1 [file s1]

Archive with 2 entries (2 files):
- Supplemental_Document_Tech_Progress_Energies to submit.pdf
- Supplemental_Information_Energies.xlsx
