# Supplementary material for: Interaction of Consumer Heterogeneity and Technological Progress in the US Electric Vehicle Market
Source: MDPI journal article supplement (doi:10.3390/en15134722), 2022-06-28
Supplement: s1 [file s1 › Supplemental_Information_Energies.xlsx]

## Sheet: Fuel_Economy_of_Vehicles
Country:	United States
Source:	Car Sales Data	http://www.goodcarbadcar.net/2018/01/december-2017-year-end-u-s-passenger-car-sales-rankings-top-171-best-selling-cars-america-every-car-ranked/
Source:	EPA Fuel Economy	https://www.fueleconomy.gov/
Units:	mpg	miles per gallon
Comment:	Mileage (mpg) for Generic models are calculated as weighted averages
Vehicle Type	Car/Sedans					Sports Utility Vehicles (SUVs)					Pickup Trucks					Minivans/Vans
	Model	Sales in Year 2017 until December End (number)	EPA Fuel Efficiency Estimate (mpg)			Model	Sales in Year 2017 until December End (number)	EPA Fuel Efficiency Estimate (mpg)			Model	Sales in Year 2017 until December End (number)	EPA Fuel Efficiency Estimate (mpg)			Model	Sales in Year 2017 until December End (number)	EPA Fuel Efficiency Estimate (mpg)
	Toyota Camry	387081	32			Toyota RAV4	407594	25			Ford F-Series	896764	22			Dodge Grand Caravan	125196	20
	Honda Civic	377286	36			Nissan Rogue	403465	29			Chevrolet Silverado	585864	20			Chrysler Pacifica	118274	22
	Toyota Corolla	329196	34			Honda CR-V	377895	30			Ram P/U	500723	20			Toyota Sienna	111489	22
	Honda Accord	322655	31			Ford Escape	308296	26			GMC Sierra	217943	20			Honda Odyssey	100307	22
	Nissan Altima	254996	31			Chevrolet Equinox	290458	32			Toyota Tacoma	198124	21			Kia Sedona	23815	21
	Nissan Sentra	218451	32			Ford Explorer	271131	22			Toyota Tundra	116285	16			Generic Minivans/Vans		21.4276
	Ford Fusion	209623	27			Jeep Grand Cherokee	240696	21			Chevrolet Colorado	112996	25
	Hyundai Elantra	198210	35			Toyota Highlander	215775	23			Nissan Frontier	74360	19
	Chevrolet Malibu	185857	30			Jeep Wrangler	190522	20			Nissan Titan	52924	18
	Chevrolet Cruze	184751	33			Subaru Outback	188886	28			Honda Ridgeline	34749	22
	Ford Focus	158385	31			Subaru Forester	177563	28			GMC Canyon	32106	25
	Hyundai Sonata	131803	31			Jeep Cherokee	169882	25			Generic Pickup Truck		20.7586
	Kia Forte	117596	32			Ford Edge	142603	24
	Subaru Impreza	117401	32			Hyundai Santa Fe	133171	24
	Volkswagen Jetta	115807	32			Toyota 4Runner	128296	18
	Kia Soul	115712	28			Mazda CX-5	127563	28
	Toyota Prius	108662	52			Honda Pilot	127279	23
	Kia Optima	107493	31			Chevrolet Traverse	123506	22
	Nissan Versa	106772	34			Hyundai Tucson	114735	27
	Dodge Charger	88351	23			GMC Acadia	111276	23
	Ford Mustang	81866	25			Subaru Crosstrek	110138	29
	Mercedes-Benz C-Class	77447	27			Lexus RX	108307	23
	Chevrolet Impala	75877	25			Jeep Renegade	103434	26
	Mazda 3	75018	32			Kia Sorento	99684	23
	Volkswagen Golf	68978	28			Chevrolet Tahoe	98961	19
	Generic Sedan		31.9794			Generic SUV		25.4001
			Calculated as a Weighted Average

## Sheet: Technical_Spefications_of_ETVs
	Technical Specifications and Performance Characteristics of Non-existing Technology Variants
			Technical Specifications				Performance
	Vehicle Type	Technology	Battery Capacity (kWh)	ICE Power (kW)	Electric Motor (kW)	Total Power (kW)	Mileage (miles per gallon)	Range (miles per charge or full battery capacity)
	Sedan	CONVENTIONAL		131		131	34
	Sedan	HEV	1	102	29	131	43
	Sedan (Short Range)	BEV-100	27		131	131		100
	Sedan (Long Range)	BEV-150	40		131	131		150
	Sedan	PHEV-40	13	85	46	131	43	40
	SUV	CONVENTIONAL		142		142	30
	SUV	HEV	1.5	111	31	142	38
	SUV (Short Range)	BEV-100	34		142	142		100
	SUV (Long Range)	BEV-150	51		142	142		150
	SUV	PHEV-40	16	92	50	142	38	40
	Van/Minivan/ Station Wagon	CONVENTIONAL		209		209	22
	Van/Minivan/ Station Wagon	HEV	1.5	163	46	209	28
	Van/Minivan/ Station Wagon (Short Range)	BEV-100	40		209	209		100
	Van/Minivan/ Station Wagon (Long Range)	BEV-150	60		209	209		150
	Van/Minivan/ Station Wagon	PHEV-40	19	136	73	209	28	40
	Truck	CONVENTIONAL		243		243	18
	Truck	HEV	1.5	190	53	243	23
	Truck (Short Range)	BEV-100	42		243	243		100
	Truck (Long Range)	BEV-150	62		243	243		150
	Truck	PHEV-40	20	158	85	243	23	40
	Sources:	Kromer MA, Heywood JB. Electric Powertrains: Opportunities and Challenges in the U.S. Light-Duty Vehicle Fleet. Cambridge, Massachusetts: 2007.
		Kromer MA, Heywood JB. Electric Powertrains : Opportunities and Challenges in the U . S . Light-Duty Vehicle Fleet 2007.
		N.R.C. Transitions to Alternative Vehicles and Fuels. Washington, D.C.: 2013. doi:10.17226/18264.
		N.R.C. Transitions to Alternative Vehicles and Fuels: Appendix F. Washington, D.C.: 2013.

## Sheet: High_Non_Battery_Cost_Model
Acronyms	HEV	Hybrid Engine Vehicle
	PHEV	Plug-in Hybrid Electric Vehicle
	BEV	Battery Electric Vehicle
	ICEV	Internal Combustion Engine Vehicle
	SUV	Sports Utility Vehicle
	EV	Electric Vehicle
	ICE	Internal Combustion Engine
	Ref	References
Units	kW	Killowatt
	kWh	Killowatt-hour
	mpg	miles per gallon
	$	US dollar
References	References
	1. Rogozhin A 2010:	Rogozhin A, Gallaher M, Helfand G, McManus W (2010) Using indirect cost multipliers to estimate the total cost of adding new technology in the automobile industry. Int J Prod Econ 124(2):360–368.
	2. ICCT 2015:	Wolfram AP, Lutsey N (2016) Electric vehicles : Literature review of technology costs and carbon emissions (Washington, D.C.) Available at: https://www.theicct.org/sites/default/files/publications/ICCT_LitRvw_EV-tech-costs_201607.pdf.
	3. MIT 2007:	Kromer M, Heywood JB (2007) Electric Powertrains: Opportunities and Challenges in the U.S. Light-Duty Vehicle Fleet (Cambridge, Massachusetts) Available at: http://web.mit.edu/sloan-auto-lab/research/beforeh2/files/kromer_electric_powertrains.pdf.
	4. NRC 2013:	1. National Research Council (2013) Transitions to Alternative Vehicles and Fuels (Washington, D.C.) doi:10.17226/18264.;
		2. N.R.C. (2013) Transitions to Alternative Vehicles and Fuels: Appendix F (Washington, D.C.) Available at: http://www.nap.edu/catalog/18264.
Basic Assumptions	1. HEV Fuel Efficiency to be 27.5% higher compared to ICEV, as the Powersplit hybrids are more efficient hybrids and have 22-33% more efficiency than ICEV (MIT 2007)
	2. Fuel Economy of PHEV to be the same as that of the HEV variant
	3. Battery for HEVs: Li-ion (though most HEVs use NiMH the latest models are expected to be produced with Li-ion technology because of higher energy density)
		Comment
Common Factors	1 Euro = 1.23 USD	As of Jan 23 2018
	Inflation 1.21	from 2006 to 2017
	Industry Average Markup 1.46	Ref: Rogozhin A., 2010
Technology	HEV: Hybrid Engine Vehicle					PHEV: Plug-in Hybrid Electric Vehicle						BEV: Battery Electric Vehicle
	Incremental Cost compared to ICEV					Incremental Cost compared to ICEV						Incremental Cost compared to ICEV
		Cost ($) in 2017					Cost ($) in 2017						Cost ($) in 2017
	Component	Fixed	Variable	Ref.		Component	Fixed	Variable	Ref.			Component	Fixed	Variable	Ref.
	Motor (Constant+per kW)	364.137	24.2758	MIT 2007		Motor (Constant+per kW)	133.182	25.8104	ICCT 2015			Motor (Constant+per kW)	133.182	25.8104	ICCT 2015
	Hybrid Transmission and Integration	364.137		NRC 2013/MIT 2007		Hybrid Transmission and Integration	364.137		NRC 2013/MIT 2007			EV Transmission	344.4		ICCT 2015
	Wiring	242.758		NRC 2013/MIT 2007		Wiring	242.758		NRC 2013/MIT 2007			Other EV Systems	939.704		ICCT 2015
	ICE engine credit for conventional starter and alternator	121.379		NRC 2013/MIT 2007		ICE engine credit for conventional starter and alternator	121.379		NRC 2013/MIT 2007			Control Unit (190.0) + Reg. Breaking (304.05) + Onboard Charger (443.4)
	Battery (per kWh)		230	ICCT 2015		Battery (per kWh)		230	ICCT 2015			Battery (per kWh)		230	ICCT 2015
	ICE Credit for downsizing (25 kW i.e. ~22% of ICEV of 115kW)	121.379		MIT 2007		ICE Credit for downsizing (40 kW i.e. ~35% of ICEV of 115kW)	242.758		MIT 2007			ICE Credit Total	3886.8		ICCT 2015
	Other EV Systems	495.25		ICCT 2015		Other EV Systems	939.704		ICCT 2015			Wiring	242.758		NRC 2013/MIT 2007
	Control Unit (184.5) + Reg. Breaking (295.2)					Control Unit (184.5) + Reg. Breaking (295.2) + Onboard Charger (430.5)
									These assumptions are made because 1. to estimate fuel efficiecies of Hybrid Variants. 2. The electric motor supplies fraction of traction to the vehicle, which in turn is reflected in cost as IC engine downsizing as well as bigger the electric motor higher is the initial capital cost.
Assmuptions for Cost Model	For HEV Technlogy					For PHEV Technlogy
Ref: NRC 2013/MIT 2007	Fuel Efficiency:	0.275	higher than ICEV			Fuel Efficiency:	0.275	higher than ICEV
	Base Vehicle Power	115	kW			Base Vehicle Power	115	kW
	Electric Motor Traction for base vehicle	25.3	kW			Electric Motor Traction for base vehicle	40.25	kW
	Electric Motor Traction	0.22	of ICEV			Electric Motor Traction	0.35	of ICEV
Incremental Cost Model																					1.46	Industry Average Markup			Ref: Rogozhin A., 2010
				Technical Specifications				Performance		Incremental Cost
		Vehicle Type	Technology	Battery Capacity (kWh)	ICE Power (kW)	Electric Motor (kW)	Total Power (kW)	Mileage (miles per gallon)	Range (miles per charge)	Total Battery Cost ($)	Battery Cell Costs ($)	Total Motor System Cost ($)	Other EV Systems ($)	Hybrid transmission and Integration ($)	Wiring ($)	EV Transmission ($)	ICE engine credit ($) for conventional starter and alternator	ICE Credit ($) for downsizing	ICE Credit ($)	Total Incremental Cost ($)	With Markup Factor ($)	MSRP ($) for the base ICEV models	MSRP Ratio
The power ratings of conventional vehicles are assumed to be the same or similar to the highest selling conventional vehicles in the U.S. For example, the Ford 150 has rated power of 325 hp (243 kW), therefore, we have assumed the electric technology vehicle trucks will have the same maximum power. This assumption is important because we do not have all the technology variants available in the ma…		Sedan	CONVENTIONAL		131.243		131.243	34														24380
		Sedan	HEV	1	102.37	28.8735	131.243	43.35		230	230	1065.06	495.25	364.137	242.758		-121.379	-138.523		2137.31	3120.47
		Sedan (Short Range)	BEV-100	26.9532		131.243	131.243		100	6199.23	6199.23	3520.61	939.704		242.758	344.4			-3886.8	7359.91	10745.5
		Sedan (Long Range)	BEV-150	40.4298		131.243	131.243		150	9298.84	9298.84	3520.61	939.704		242.758	344.4			-3886.8	10459.5	15270.9
		Sedan	PHEV-40	12.7501	85.308	45.935	131.243	43.35	40	2932.52	2932.52	1318.78	939.704	364.137	242.758		-121.379	-277.046		5399.48	7883.24
		SUV	CONVENTIONAL		141.68		141.68	30														25500	1.04594
		SUV	HEV	1.5	110.51	31.1696	141.68	38.25		345	345	1120.8	495.25	364.137	242.758		-121.379	-149.539		2297.03	3353.66
		SUV (Short Range)	BEV-100	33.9348		141.68	141.68		100	7805.01	7805.01	3790	939.704		242.758	344.4			-4065.36	9056.51	13222.5
		SUV (Long Range)	BEV-150	50.9022		141.68	141.68		150	11707.5	11707.5	3790	939.704		242.758	344.4			-4065.36	12959	18920.2
		SUV	PHEV-40	16.0527	92.092	49.588	141.68	38.25	40	3692.13	3692.13	1413.07	939.704	364.137	242.758		-121.379	-299.078		6231.34	9097.75
		Van/Minivan/ Station Wagon	CONVENTIONAL		208.796		208.796	22														30965	1.2701
		Van/Minivan/ Station Wagon	HEV	1.5	162.861	45.9351	208.796	28.05		345	345	1479.25	495.25	364.137	242.758		-121.379	-220.378		2584.64	3773.57
		Van/Minivan/ Station Wagon (Short Range)	BEV-100	40.2259		208.796	208.796		100	9251.96	9251.96	5522.29	939.704		242.758	344.4			-4936.62	11364.5	16592.2
		Van/Minivan/ Station Wagon (Long Range)	BEV-150	60.3389		208.796	208.796		150	13877.9	13877.9	5522.29	939.704		242.758	344.4			-4936.62	15990.5	23346.1
		Van/Minivan/ Station Wagon	PHEV-40	19.0287	135.717	73.0786	208.796	28.05	40	4376.61	4376.61	2019.37	939.704	364.137	242.758		-121.379	-440.756		7380.44	10775.4
		Truck	CONVENTIONAL		243		243	18														37830	1.55168
		Truck	HEV	1.5	189.54	53.46	243	22.95		345	345	1661.92	495.25	364.137	242.758		-121.379	-256.479		2731.21	3987.56
		Truck (Short Range)	BEV-100	41.5224		243	243		100	9550.16	9550.16	6405.11	939.704		242.758	344.4			-6031.08	11451.1	16718.5
		Truck (Long Range)	BEV-150	62.2837		243	243		150	14325.2	14325.2	6405.11	939.704		242.758	344.4			-6031.08	16226.1	23690.2
		Truck	PHEV-40	19.642	157.95	85.05	243	22.95	40	4517.67	4517.67	2328.35	939.704	364.137	242.758		-121.379	-512.958		7758.29	11327.1
Sources:	Vehicle Models for specifications
	Toyota Camry	https://www.toyota.com/camry/ebrochure
	Honda CRV Specs	http://owners.honda.com/vehicles/information/2018/CR-V/specs#mid^RW1H5JJW
	Toyota RAV4 Specs	https://www.toyota.com/rav4/features/mpg/4430/4435/4440
	Honda Odyssey Specs	http://owners.honda.com/vehicles/information/2018/Odyssey/specs#mid^RL6H9JKXW
	Ford 150	http://www.motortrend.com/cars/ford/f-150/2018/
Battery Efficiency Calculations						The battery efficiency is an important component in calculating how much electricity a consumer will consume as well as the emissions the vehicle will emit. We have calculated the battery efficiencies for each vehicle type in proportion to their ICEV counterparts. The initial BEV and PHEV battery efficiencies are calculated as averages of battery efficiencies of available electric vehicles in the…
Sedan							Battery Efficiency			BEV	PHEV
BEV		Battery Capacity (kWh)	Range (miles)	Battery Efficiency (miles/kWh)				Gasoline Efficiency of Generic Models (mpg)	% lower than ICEV Sedan	Battery efficiency (miles/kWh)	Battery efficiency (miles/kWh)
Source: https://www.fueleconomy.gov/	Honda Clarity EV	25.5	89	3.4902			Sedan	31.9794		3.71014	3.13723
	Mercedes Benz 250e	28	84	3			SUV	25.4001	0.205737	2.94683	2.49179
	Hyundai Ioniq	28	110	3.92857			Van/Minivan	21.4276	0.329955	2.48596	2.10209
	Tesla Model 3	50	220	4.4			Truck	20.7586	0.350877	2.40834	2.03645
	Tesla Model S	60	210	3.5
	Chevrolet Bolt	60	238	3.96667
	Volkawagen eGolf	35.8	125	3.49162
	Nissan Leaf	30	107	3.56667
	Ford Focus	23	100	4.34783
	Kia Soul	30.5	104	3.40984
	Average			3.71014
PHEV		Battery Capacity (kWh)	Range (miles)	Battery Efficiency (miles/kWh)
Source: https://www.fueleconomy.gov/	Honda Clarity PHEV	17	47	2.76471
	Toyota Prius Prime	4.4	25	5.68182
	Ford Energi Plug in	7.6	21	2.76316
	Chevrolet Volt	18.4	53	2.88043
	Hyundai Sonata Plug in	9.8	27	2.7551
	BMW 330e Plug in	7.6	22	2.89474
	Kia Niro	8.9	34	3.82022
	Kia Optima	9.8	29	2.95918
	Cadillac ELR	17	40	2.35294
	Ford C MAX Energi	8	20	2.5
	Average			3.13723

## Sheet: Low_Non_Battery_Cost_Model
	Source:	https://data.bloomberglp.com/bnef/sites/14/2017/06/BNEF_2017_04_12_EV-Price-Parity-Report.pdf
	Vehicle Type	Battery Capacity (kWh)	Power (kW)	Powertrain Cost ($)
	Small Car	56	70	2000
	Medium Car	73	120	2500
	Large Car	95	150	3000
	SUV	98	175	3500
					Slope	Constant
				Equation	14.096	935.14
			Ratio of PHEV to ICEV power ratings	0.648855
Non Battery Cost Model
		Technical Specifications for this study
	Vehicle Type	Battery Capacity (kWh)	Power (kW) (for BEV vehicle power and for PHEV engine power)	Cost of Powertrain ($)	Cost of Powertrain ($)
	Sedan 100	27	131	2781.72
	Sedan 150	40	131	2781.72
	Sedan PHEV-40	13	85		1808.12
	Van 100	40	209	3881.2
	Van 150	60	209	3881.2
	Van PHEV-40	19	136		2522.78
	SUV 100	34	142	2936.77
	SUV 150	51	142	2936.77
	SUV PHEV-40	16	92		1908.9
	Truck 100	42	243	4360.47
	Truck 150	62	243	4360.47
	Truck PHEV-40	20	158		2834.3
Incremental Cost Model														1.46	Industry Average Markup		Ref: Rogozhin A., 2010
			Technical Specifications				Performance		Incremental Cost
	Vehicle Type	Technology	Battery Capacity (kWh)	ICE Power (kW)	Electric Motor (kW)	Total Power (kW)	Mileage (miles per gallon)	Range (miles per charge)	Total Battery Cost ($)	Total Powertrain Cost ($)	ICE engine credit ($) for conventional starter and alternator	ICE Credit ($) for downsizing	ICE Credit ($)	Total Incremental Cost ($)	With Markup Factor ($)
	Sedan	CONVENTIONAL		131.243		131.243	34
	Sedan	HEV	1	102.37	28.8735	131.243	43.35		230	2167.21	-121.379	-138.523		2137.31	3120.47
	Sedan (Short Range)	BEV-100	27	0	131.243	131.243		100	6199.23	2781.72			-3886.8	5094.15	7437.45
	Sedan (Long Range)	BEV-150	40	0	131.243	131.243		150	9298.84	2781.72			-3886.8	8193.76	11962.9
	Sedan	PHEV-40	13	85.308	45.935	131.243	43.35	40	2932.52	1808.12			-2521.97	2218.67	3239.26
	SUV	CONVENTIONAL		141.68		141.68	30
	SUV	HEV	1.5	110.51	31.1696	141.68	38.25		345	2222.95	-121.379	-149.539		2297.03	3353.66
	SUV (Short Range)	BEV-100	34	0	141.68	141.68		100	7805.01	2936.77			-4065.36	6676.42	9747.57
	SUV (Long Range)	BEV-150	51	0	141.68	141.68		150	11707.5	2936.77			-4065.36	10578.9	15445.2
	SUV	PHEV-40	16	92.092	49.588	141.68	38.25	40	3692.13	1908.9			-2637.83	2963.2	4326.28
	Van/Minivan/ Station Wagon	CONVENTIONAL		208.796		208.796	22
	Van/Minivan/ Station Wagon	HEV	1.5	162.861	45.9351	208.796	28.05		345	2581.39	-121.379	-220.378		2584.64	3773.57
	Van/Minivan/ Station Wagon (Short Range)	BEV-100	40	0	208.796	208.796		100	9251.96	3881.2			-4936.62	8196.55	11967
	Van/Minivan/ Station Wagon (Long Range)	BEV-150	60	0	208.796	208.796		150	13877.9	3881.2			-4936.62	12822.5	18720.9
	Van/Minivan/ Station Wagon	PHEV-40	19	135.717	73.0786	208.796	28.05	40	4376.61	2522.78			-3203.15	3696.24	5396.51
	Truck	CONVENTIONAL		243		243	18
	Truck	HEV	1.5	189.54	53.46	243	22.95		345	2764.07	-121.379	-256.479		2731.21	3987.56
	Truck (Short Range)	BEV-100	42	0	243	243		100	9550.16	4360.47			-6031.08	7879.55	11504.1
	Truck (Long Range)	BEV-150	62	0	243	243		150	14325.2	4360.47			-6031.08	12654.6	18475.8
	Truck	PHEV-40	20	157.95	85.05	243	22.95	40	4517.67	2834.3			-3913.29	3438.68	5020.47
										Low Non Battery Cost Model	High Non Battery Cost Model
									Total Battery Cost ($)	9050.88	9050.88
									Total Powertrain Cost ($)	4061.31	7369.32
									ICE Credit ($)	-5674.73	-5674.73
									Final Additional Cost ($)	7437.45	10745.5

## Sheet: Battery_Size_Calculation
	Yearly Sales of the vehicles in the U.S.
												For Each Year (Weighted Average) Battery Size (kWh)
Model	Type	2011	2012	2013	2014	2015	2016	TOTAL		Model-wise Battery Size (kWh) for each vehicle	For Total	2012	2013	2014	2015	2016	2017	2018
Nissan LEAF	EV	9674	9819	22610	30200	17269	14006	103578		30	50.5662	36.6082	49.87	43.1284	48.4658	63.8914	62	74
Tesla Model S	EV	0	2171	19000	16750	26200	29156	93277		81
BMW i3	EV	0	0	0	6092	11004	7625	24721		33
Ford Focus EV	EV	0	683	1738	1964	1582	872	6839		33.5
Fiat 500E	EV	0	0	260	1503	4569	3897	10229		24
Smart forTwo EV	EV	0	137	923	2594	1387	657	5698		17.6
VW e-Golf	EV	0	0	0	357	4232	0	4589		35.8
Chevrolet Spark	EV	0	0	560	1145	2629	3035	7369		19
Mercedes B-Class Electric	EV	0	0	0	774	1906	632	3312		28
Toyota RAV4 EV	EV	0	192	1005	1184	18	NA	2399		41.8
Mitsubishi i-MiEV	EV	76	588	1029	196	115	94	2098		16
Kia Soul EV	EV	0	0	0	250	1015	1728	2993		27
Honda Fit EV	EV	0	93	569	407	2	NA	1071		20
BMW Active E	EV	0	965	0	0	0	0	965		22
Tesla Model X	EV	0	0	0	0	208	18028	18236		100
Average Battery Size (kWh)			38	44	50.25	50.75	54		from graph
Average Battery Size (kWh)			36.6082	49.87	43.1284	48.4658	63.8914		Calculated Weighted Averages			For Each Year (Weighted Average) Battery Size (kWh)
											For Total	2012	2013	2014	2015	2016
Chevrolet Volt PHEV	PHEV	7671	23461	23094	18805	15393	24739	113163		18.4	11.6907	12.9745	11.5143	10.3707	11.1044	11.7541
Toyota Prius Prime Plug-in	PHEV	0	12749	12088	13264	4191	2474	44766		4.4
Ford Fusion Energi	PHEV	0	0	6089	11550	9750	15938	43327		7.6
Ford C-MAX Energi PHEV	PHEV	0	2374	7154	8433	7591	7957	33509		5.4
BMW i8	PHEV	0	0	0	555	2265	1594	4414		7.1
Cadillac ELR	PHEV	0	0	6	1310	1024	534	2874		17.1
Porsche Panamera S E-Hybrid	PHEV	0	0	51	879	407	393	1730		9.4
Porsche Cayenne S E-Hybrid	PHEV	0	0	0	112	1163	2111	3386		10.8
Honda Accord	PHEV	0	0	526	449	63	NA	1038		1.3
BMW X5	PHEV	0	0	0	0	892	5995	6887		9.2
Smart ED	PHEV	310	2	0	0	0	NA	312		17.6
Mercedes S550 Plug in	PHEV	0	0	0	0	118	550	668		8.7
Volvo XC90	PHEV	0	0	0	0	86	2020	2106		9.3
Total		17731	48200	96702	118773	113869	144035	539310
Source: InsideEVs
Model	Type	2011	2012	2013	2014	2015	2016	TOTAL		U.S. Stock Data (Units)				Calculated Average Battery Capacity (kWh)
Nissan LEAF	EV	9674	9819	22610	30200	17269	14006	103578		Year	17269	14006		BEV	PHEV
Tesla Model S	EV	0	2171	19000	16750	26200	29156	93277		2005	1120
BMW i3	EV	0	0	0	6092	11004	7625	24721		2006	1120
Ford Focus EV	EV	0	683	1738	1964	1582	872	6839		2007	1120
Fiat 500E	EV	0	0	260	1503	4569	3897	10229		2008	2580
Smart forTwo EV	EV	0	137	923	2594	1387	657	5698		2009	2580
VW e-Golf	EV	0	0	0	357	4232	0	4589		2010	3770
Chevrolet Spark	EV	0	0	560	1145	2629	3035	7369		2011	13520	7980
Mercedes B-Class Electric	EV	0	0	0	774	1906	632	3312		2012	28170	46570		36.6082	12.9745
Toyota RAV4 EV	EV	0	192	1005	1184	18	NA	2399		2013	75860	95580		49.87	11.5143
Mitsubishi i-MiEV	EV	76	588	1029	196	115	94	2098		2014	139280	150940		43.1284	10.3707
Kia Soul EV	EV	0	0	0	250	1015	1728	2993		2015	210330	193770		48.4658	11.1044
Honda Fit EV	EV	0	93	569	407	2	NA	1071		2016	297060	266650		63.8914	11.7541
BMW Active E	EV	0	965	0	0	0	0	965		2017	401550	360510		74	11.6907
Tesla Model X	EV	0	0	0	0	208	18028	18236
										Total Vehicles (Units)	762060
Average Battery Size (kWh)			38	44	50.25	50.75	54			Total Capacity (kWh)	29714700	4.21463e+06
Average Battery Size (kWh)			14006	0	BEV	PHEV	0			Total Capacity (kWh)	3.39293e+07
										At the end of 2017
Chevrolet Volt PHEV	PHEV	7671	23461	23094	18805	15393	24739	113163
Toyota Prius Prime Plug-in	PHEV	0	12749	12088	13264	4191	2474	44766
Ford Fusion Energi	PHEV	0	0	6089	11550	9750	15938	43327
Ford C-MAX Energi PHEV	PHEV	0	2374	7154	8433	7591	7957	33509
BMW i8	PHEV	0	0	0	555	2265	1594	4414
Cadillac ELR	PHEV	0	0	6	1310	1024	534	2874
Porsche Panamera S E-Hybrid	PHEV	0	0	51	879	407	393	1730
Porsche Cayenne S E-Hybrid	PHEV	0	0	0	112	1163	2111	3386
Honda Accord	PHEV	0	0	526	449	63	NA	1038
BMW X5	PHEV	0	0	0	0	892	5995	6887
Smart ED	PHEV	310	2	0	0	0	NA	312
Mercedes S550 Plug in	PHEV	0	0	0	0	118	550	668
Volvo XC90	PHEV	0	0	0	0	86	2020	2106
Total		17731	48200	96702	118773	113869	144035	539310

## Sheet: Total_Capacity_Calculations
Source: World EV outlook 2018 (IEA)
	U.S. Stock Data (in thousands)				U.S. Stock Data (Units)				Calculated Average Battery Capacity (kWh)
Year	BEV	PHEV	Change in Stocks		Year	BEV	PHEV		BEV	PHEV
2005	1.12				2005	1120
2006	1.12				2006	1120
2007	1.12				2007	1120
2008	2.58				2008	2580
2009	2.58				2009	2580
2010	3.77				2010	3770
2011	13.52	7.98			2011	13520	7980
2012	28.17	46.57	53.24		2012	28170	46570		36.6082	12.9745
2013	75.86	95.58	96.7		2013	75860	95580		49.87	11.5143
2014	139.28	150.94	118.78		2014	139280	150940		43.1284	10.3707
2015	210.33	193.77	113.88		2015	210330	193770		48.4658	11.1044
2016	297.06	266.65	159.61		2016	297060	266650		63.8914	11.7541
2017	401.55	360.51	198.35		2017	401550	360510		74	11.6907
			Total Vehicles (Units)			762060
	At the end of 2017		Total Capacity (kWh)			29714700	4.21463e+06
			Total Capacity (kWh)			3.39293e+07

## Sheet: PEV_Sales
Vehicle	Type	2011	2012	2013	2014	2015	2016	2017	TOTAL		Source	AFDC
Audi A3 Plug In	PHEV						4280	2877	7157
BMW Active E	EV		965						965
BMW i3	EV				6092	11004	7625	6276	30997
BMW i8	PHEV				555	2265	1594	488	4902
BMW X5	PHEV					774	5995	5349	12118
BMW 3 Series Plug In	PHEV					54	851	4141	5046
BMW 5 Series Plug In	PHEV							3759	3759
BMW 7 Series Plug In	PHEV						23	707	730
Cadillac CT6	PHEV							205	205
Cadillac ELR	PHEV			6	1310	1024	534	17	2891
Chevrolet Bolt	EV						579	23297	23876
Chevrolet Spark	EV			560	1145	2629	3035	23	7392
Chevrolet Volt	PHEV	7671	23461	23094	18805	15393	24739	20349	133512
Chrysler Pacifica	PHEV							2764	2764
Fiat 500E	EV			260	1503	3477	3737	3336	12313
Ford C-MAX Energi	PHEV		2374	7154	8433	7591	7957	8140	41649
Ford Focus EV	EV		683	1738	1964	1582	901	1817	8685
Ford Fusion Energi	PHEV			6089	11550	9750	15938	9632	52959
Honda Accord	PHEV			526	449	63			1038
Honda Clarity BEV	EV							1111	1111
Honda Clarity Plug-in	PHEV							898	898
Honda Fit EV	EV		93	569	407	2			1071
Hyundai Sonata Plug-in	PHEV						3000	2254	5254
Hyundai Ioniq EV	EV							427	427
Kia Optima Plug-in	PHEV							1542	1542
Kia Soul EV	EV				250	1015	1728	2157	5150
Mercedes B-Class Electric	EV				774	1906	632	744	4056
Mercedes C350We Plug-in Hybrid	PHEV						171	810	981
Mercedes GLE 550e Hybrid	PHEV						212	430	642
Mercedes S550 Plug In	PHEV					118	550	583	1251
Mini Cooper Countryman Plug In	PHEV							475	475
Mitsubishi i-MiEV	EV	76	588	1029	196	115	94	6	2104
Nissan LEAF	EV	9674	9819	22610	30200	17269	14006	11230	114808
Porsche Cayenne S E-Hybrid	PHEV				112	1163	2111	1574	4960
Porsche Panamera S E-Hybrid	PHEV			51	879	407	393	18	1748
Smart ED	EV	310	2						312
Smart for Two EV	EV		137	923	2594	1387	657	543	6241
Tesla Model 3	EV							1770	1770
Tesla Model S	EV		2171	19000	16750	26200	30200	26500	120821
Tesla Model X	EV					208	19600	21700	41508
Toyota Prius Prime	PHEV		12749	12088	13264	4191	2474	20936	65702
Toyota RAV4 EV	EV		192	1005	1184	18			2399
Volvo S90 Plug In	PHEV							112	112		Ratio of PEV sales to Car Sales	0.00291178	0.00734905	0.0124284	0.0149992	0.0147351	0.0224598	0.0308301	0.481845
Volvo XC60	PHEV							518	518
Volvo XC90	PHEV					86	2015	2196	4297		Car Sales in the US	6089403	7243654	7780710	7918601	7731429	7104593	6332925	0.00561746
VW e-Golf	EV				357	4232	3937	3534	12060			2011	2012	2013	2014	2015	2016	2017
Total		17731	53234	96702	118773	113923	159568	195245	755176
			2.00231	0.816546	0.228237	-0.0408342	0.400665	0.223585	-0.354967	0.605085
											Percent Growth in Sales
Vehicle	Type	2011	2012	2013	2014	2015	2016	2017	TOTAL			2011	2012	2013	2014	2015	2016	2017
BMW Active E	EV		965						965		BMW Active E		0	-1	0	0	0	0
BMW i3	EV				6092	11004	7625	6276	30997		BMW i3		0	0	0	0.806303	-0.30707	-0.176918
Chevrolet Bolt	EV						579	23297	23876		Chevrolet Bolt		0	0	0	0	0	39.2366
Chevrolet Spark	EV			560	1145	2629	3035	23	7392		Chevrolet Spark		0	0	1.04464	1.29607	0.154431	-0.992422
Fiat 500E	EV			260	1503	3477	3737	3336	12313		Fiat 500E		0	0	4.78077	1.31337	0.0747771	-0.107305
Ford Focus EV	EV		683	1738	1964	1582	901	1817	8685		Ford Focus EV		0	1.54466	0.130035	-0.194501	-0.430468	1.01665
Honda Clarity BEV	EV							1111	1111		Honda Clarity BEV		0	0	0	0	0	0
Honda Fit EV	EV		93	569	407	2			1071		Honda Fit EV		0	5.11828	-0.28471	-0.995086	-1	0
Hyundai Ioniq EV	EV							427	427		Hyundai Ioniq EV		0	0	0	0	0	0
Kia Soul EV	EV				250	1015	1728	2157	5150		Kia Soul EV		0	0	0	3.06	0.702463	0.248264
Mercedes B-Class Electric	EV				774	1906	632	744	4056		Mercedes B-Class Electric		0	0	0	1.46253	-0.668416	0.177215
Mitsubishi i-MiEV	EV	76	588	1029	196	115	94	6	2104		Mitsubishi i-MiEV		6.73684	0.75	-0.809524	-0.413265	-0.182609	-0.93617
Nissan LEAF	EV	9674	9819	22610	30200	17269	14006	11230	114808		Nissan LEAF		0.0149886	1.30268	0.335692	-0.428179	-0.188951	-0.198201
Smart ED	EV	310	2						312		Smart ED		-0.993548	-1	0	0	0	0
Smart for Two EV	EV		137	923	2594	1387	657	543	6241		Smart for Two EV		0	5.73723	1.8104	-0.465305	-0.526316	-0.173516
Tesla Model 3	EV							1770	1770		Tesla Model 3		0	0	0	0	0	0
Tesla Model S	EV		2171	19000	16750	26200	30200	26500	120821		Tesla Model S		0	7.75173	-0.118421	0.564179	0.152672	-0.122517
Tesla Model X	EV					208	19600	21700	41508		Tesla Model X		0	0	0	0	93.2308	0.107143
Toyota RAV4 EV	EV		192	1005	1184	18			2399		Toyota RAV4 EV		0	4.23438	0.178109	-0.984797	-1	0
VW e-Golf	EV				357	4232	3937	3534	12060		VW e-Golf		0	0	0	10.8543	-0.069707	-0.102362
Total		10060	14650	47694	63416	71044	86731	104471	398066				0.456262	2.25556	0.329643	0.120285	0.220807	0.20454
											Percent Growth in Sales
Vehicle	Type	2011	2012	2013	2014	2015	2016	2017	TOTAL			2011	2012	2013	2014	2015	2016	2017
Audi A3 Plug In	PHEV						4280	2877	7157		Audi A3 Plug In		0	0	0	0	0	-0.327804
BMW i8	PHEV				555	2265	1594	488	4902		BMW i8		0	0	0	3.08108	-0.296247	-0.693852
BMW X5	PHEV					774	5995	5349	12118		BMW X5		0	0	0	0	6.74548	-0.107756
BMW 3 Series Plug In	PHEV					54	851	4141	5046		BMW 3 Series Plug In		0	0	0	0	14.7593	3.86604
BMW 5 Series Plug In	PHEV							3759	3759		BMW 5 Series Plug In		0	0	0	0	0	0
BMW 7 Series Plug In	PHEV						23	707	730		BMW 7 Series Plug In		0	0	0	0	0	29.7391
Cadillac CT6	PHEV							205	205		Cadillac CT6		0	0	0	0	0	0
Cadillac ELR	PHEV			6	1310	1024	534	17	2891		Cadillac ELR		0	0	217.333	-0.218321	-0.478516	-0.968165
Chevrolet Volt	PHEV	7671	23461	23094	18805	15393	24739	20349	133512		Chevrolet Volt		2.0584	-0.015643	-0.185719	-0.181441	0.607159	-0.177453
Chrysler Pacifica	PHEV							2764	2764		Chrysler Pacifica		0	0	0	0	0	0
Ford C-MAX Energi	PHEV		2374	7154	8433	7591	7957	8140	41649		Ford C-MAX Energi		0	2.01348	0.178781	-0.0998458	0.048215	0.0229986
Ford Fusion Energi	PHEV			6089	11550	9750	15938	9632	52959		Ford Fusion Energi		0	0	0.896863	-0.155844	0.634667	-0.395658
Honda Accord	PHEV			526	449	63			1038		Honda Accord		0	0	-0.146388	-0.859688	-1	0
Honda Clarity Plug-in	PHEV							898	898		Honda Clarity Plug-in		0	0	0	0	0	0
Hyundai Sonata Plug-in	PHEV						3000	2254	5254		Hyundai Sonata Plug-in		0	0	0	0	0	-0.248667
Kia Optima Plug-in	PHEV							1542	1542		Kia Optima Plug-in		0	0	0	0	0	0
Mercedes C350We Plug-in Hybrid	PHEV						171	810	981		Mercedes C350We Plug-in Hybrid		0	0	0	0	0	3.73684
Mercedes GLE 550e Hybrid	PHEV						212	430	642		Mercedes GLE 550e Hybrid		0	0	0	0	0	1.0283
Mercedes S550 Plug In	PHEV					118	550	583	1251		Mercedes S550 Plug In		0	0	0	0	3.66102	0.06
Mini Cooper Countryman Plug In	PHEV							475	475		Mini Cooper Countryman Plug In		0	0	0	0	0	0
Porsche Cayenne S E-Hybrid	PHEV				112	1163	2111	1574	4960		Porsche Cayenne S E-Hybrid		0	0	0	9.38393	0.815133	-0.254382
Porsche Panamera S E-Hybrid	PHEV			51	879	407	393	18	1748		Porsche Panamera S E-Hybrid		0	0	16.2353	-0.536974	-0.034398	-0.954198
Toyota Prius Prime	PHEV		12749	12088	13264	4191	2474	20936	65702		Toyota Prius Prime		0	-0.0518472	0.0972866	-0.684032	-0.409687	7.46241
Volvo S90 Plug In	PHEV							112	112		Volvo S90 Plug In		0	0	0	0	0	0
Volvo XC60	PHEV							518	518		Volvo XC60		0	0	0	0	0	0
Volvo XC90	PHEV					86	2015	2196	4297		Volvo XC90		0	0	0	0	22.4302	0.0898263
Total		7671	38584	49008	55357	42879	72837	90774	357110				4.02985	0.270164	0.12955	-0.22541	0.698664	0.246262

## Sheet: ICEV_Cost_Premium
		Cost Increment																NRC 2013	Efficiency Cost Increment Over Baseline 2010 (2010 USD)
Source	Year	2015 Euro	2015 USD	2019 USD																Cars					Truck
NRC 2013 M	2010	0	0	0		Ref:	Mock P, Schmid SA. Fuel cells for automotive powertrains-A techno-economic assessment. Journal of Power Sources 2009;190:133–40. doi:10.1016/j.jpowsour.2008.10.123.													Midrange		Optimistic			Midrange		Optimistic
Mock 2013	2015	250	280.899	297.753			National Research Council (N.R.C.) Transitions to Alternative Vehicles and Fuels. (2013). doi:10.17226/18264													ICE	HEV	ICE	HEV		ICE	HEV	ICE	HEV
NRC 2013 O	2015	400	449.438	476.404			N.R.C. Transitions to Alternative Vehicles and Fuels: Appendix F. (2013).												2010	0	4020	0	4020		0	4935	0	4935
NRC 2013 M	2015	450	505.618	535.955															2015	435	3510	376	3006		460	4228	400	3601
NRC 2013 O	2020	600	674.157	714.607															2020	986	2989	867	2485		1059	3516	939	2890
NRC 2013 M	2020	750	842.697	893.258															2025	1652	3017	1473	2590		1798	3446	1618	2942
Mock 2013	2020	1000	1123.6	1191.01															2030	2433	3280	2195	2765		2676	3711	2436	3160
NRC 2013 O	2025	1150	1292.13	1369.66															2035	1675	3357	2432	1973		2978	3834	2734	3408
NRC 2013 M	2025	1250	1404.49	1488.76															2040	2960	3638	2713	3267		3332	4171	3085	3770
NRC 2013 O	2030	1750	1966.29	2084.27															2045	3288	3949	3036	3577		3738	4540	3487	4142
NRC 2013 M	2030	1900	2134.83	2262.92															2050	3659	4347	3403	3960		4196	5022	3941	4611
M-Moderate
O-Optimistic																			Efficiency Cost Increment Over Baseline 2010 (2019 USD)
																				Cars					Truck
	Year	Avg. Cost Increment ($)																		Midrange		Optimistic			Midrange		Optimistic
	2010	0																		ICE	HEV	ICE	HEV		ICE	HEV	ICE	HEV
	2015	436.704																	2010	0	4623	0	4623		0	5675.25	0	5675.25
	2020	932.959																	2015	500.25	4036.5	432.4	3456.9		529	4862.2	460	4141.15
	2025	1429.21																	2020	1133.9	3437.35	997.05	2857.75		1217.85	4043.4	1079.85	3323.5
	2030	2173.6																	2025	1899.8	3469.55	1693.95	2978.5		2067.7	3962.9	1860.7	3383.3
																			2030	2797.95	3772	2524.25	3179.75		3077.4	4267.65	2801.4	3634
																			2035	1926.25	3860.55	2796.8	2268.95		3424.7	4409.1	3144.1	3919.2
																			2040	3404	4183.7	3119.95	3757.05		3831.8	4796.65	3547.75	4335.5
																			2045	3781.2	4541.35	3491.4	4113.55		4298.7	5221	4010.05	4763.3
																			2050	4207.85	4999.05	3913.45	4554		4825.4	5775.3	4532.15	5302.65
						Our Proposal
BNEF	Price of the ICEVs
	Medium Sedan	SUV		Increase per year % (Or CAGR)		0.00583707	Sedan			Van			SUV			TRUCK
2018	28500	37500
2030	31000	40000				0.00583707	Power Ratio PHEV to ICE	0.65		Ratio of Engine kW (Van/Sedan)	1.59		Ratio of Engine kW (SUV/Sedan)	1.08		Ratio of Engine kW (TRUCK/Sedan)	1.85
	Calculated CAGR						For ICEV	For PHEV		For ICEV	For PHEV		For ICEV	For PHEV		For ICEV	For PHEV
Increase per year %	0.00703153	0.0053927		Price of a Conventional Sedan		24380	Increase by ($)			Increase by ($)
					2018	24380
					2019	24522.3	142.308	92.5001		226.27	147.075		153.692	99.9001		263.27	171.125
Arthur D. Little					2020	24664.6	284.616	185		452.539	294.15		307.385	199.8		526.539	342.25
	Price of Sedan				2021	24806.9	426.924	277.5		678.809	441.226		461.077	299.7		789.809	513.376
2015	17146				2022	24949.2	569.231	370		905.078	588.301		614.77	399.6		1053.08	684.501
2025	18126				2023	25091.5	711.539	462.501		1131.35	735.376		768.462	499.501		1316.35	855.626
					2024	25233.8	853.847	555.001		1357.62	882.451		922.155	599.401		1579.62	1026.75
Increase per year % (Calculated CAGR)	0.00464262				2025	25376.2	996.155	647.501		1583.89	1029.53		1075.85	699.301		1842.89	1197.88
					2026	25518.5	1138.46	740.001		1810.16	1176.6		1229.54	799.201		2106.16	1369
					2027	25660.8	1280.77	832.501		2036.43	1323.68		1383.23	899.101		2369.43	1540.13
					2028	25803.1	1423.08	925.001		2262.7	1470.75		1536.92	999.001		2632.7	1711.25
					2029	25945.4	1565.39	1017.5		2488.96	1617.83		1690.62	1098.9		2895.97	1882.38
					2030	26087.7	1707.69	1110		2715.23	1764.9		1844.31	1198.8		3159.23	2053.5
					2031	26230	1850	1202.5		2941.5	1911.98		1998	1298.7		3422.5	2224.63
					2032	26372.3	1992.31	1295		3167.77	2059.05		2151.69	1398.6		3685.77	2395.75
					2033	26514.6	2134.62	1387.5		3394.04	2206.13		2305.39	1498.5		3949.04	2566.88
					2034	26656.9	2276.93	1480		3620.31	2353.2		2459.08	1598.4		4212.31	2738
					2035	26799.2	2419.23	1572.5		3846.58	2500.28		2612.77	1698.3		4475.58	2909.13
					2036	26941.5	2561.54	1665		4072.85	2647.35		2766.46	1798.2		4738.85	3080.25
					2037	27083.8	2703.85	1757.5		4299.12	2794.43		2920.16	1898.1		5002.12	3251.38
					2038	27226.2	2846.16	1850		4525.39	2941.5		3073.85	1998		5265.39	3422.5
					2039	27368.5	2988.47	1942.5		4751.66	3088.58		3227.54	2097.9		5528.66	3593.63
					2040	27510.8	3130.77	2035		4977.93	3235.65		3381.23	2197.8		5791.93	3764.75
Ref:	BNEF	Soulopoulos, N. When Will Electric Vehicles be Cheaper than Conventional Vehicles? Bloomberg New Energy Finance (2017).
	Arthur D. Little	Brennan, J. W. & Barder, T. E. Battery Electric Vehicles vs . Internal Combustion Engine Vehicles. Arthur D Little (2016). doi:10.1016/0375-9601(72)90803-1

## Sheet: Fuel_Efficiency_Increase
Source:	UMTRI-(University of Michigan Transportation Research Institute). Sustainable Worldwide Transportation - Sales-weighted fuel economy (window sticker). University of Michigan Transportation Research Institute 2018:1. http://www.umich.edu/~umtriswt/EDI_sales-weighted-mpg.html (accessed November 15, 2018).
Month-Year	Sales-weighted MPG			MPG
2007-10-01	20.1		2007	20.2
2007-11-01	20.4		2008	20.9083
2007-12-01	20.1		2009	21.575
2008-01-01	20.5		2010	22.0917
2008-02-01	20.4		2011	22.5167
2008-03-01	20.8		2012	23.7333
2008-04-01	21.2		2013	24.5333
2008-05-01	21.7		2014	25.125
2008-06-01	21.4		2015	25.075
2008-07-01	21.3		2016	25.1167
2008-08-01	20.8		2017	25.2167		Avg. MPG Growth Compared to 2017
2008-09-01	20.6		2018	26.6		0.0548579
2008-10-01	21		2019	27.15		0.0766689
2008-11-01	20.7		2020	27.7		0.0984798
2008-12-01	20.5		2021	28.25		0.120291
2009-01-01	21		2022	28.8		0.142102
2009-02-01	21		2023	29.35		0.163913
2009-03-01	21.2		2024	29.9		0.185724
2009-04-01	21.2		2025	30.45		0.207535
2009-05-01	21.3		2026	31		0.229346
2009-06-01	21.4		2027	31.55		0.251157
2009-07-01	22.1		2028	32.1		0.272968
2009-08-01	22.4		2029	32.65		0.294779
2009-09-01	21.1		2030	33.2		0.31659
2009-10-01	22.1		2031	33.75		0.338401
2009-11-01	22.1		2032	34.3		0.360212
2009-12-01	22		2033	34.85		0.382022
2010-01-01	22.2		2034	35.4		0.403833
2010-02-01	22.1		2035	35.95		0.425644
2010-03-01	22.1		2036	36.5		0.447455
2010-04-01	22.1		2037	37.05		0.469266
2010-05-01	22.1		2038	37.6		0.491077
2010-06-01	22		2039	38.15		0.512888
2010-07-01	22.1		2040	38.7		0.534699
2010-08-01	22.1		2041	39.25		0.55651
2010-09-01	21.9		2042	39.8		0.578321
2010-10-01	22.1
2010-11-01	22.2
2010-12-01	22.1
2011-01-01	22.3
2011-02-01	22.5
2011-03-01	22.7
2011-04-01	22.6
2011-05-01	22.6
2011-06-01	22.4
2011-07-01	22.4
2011-08-01	22.1
2011-09-01	22.1
2011-10-01	22.9
2011-11-01	23
2011-12-01	22.6
2012-01-01	23.4
2012-02-01	23.7
2012-03-01	23.9
2012-04-01	23.7
2012-05-01	23.6
2012-06-01	23.4
2012-07-01	23.4
2012-08-01	23.6
2012-09-01	23.6
2012-10-01	24.3
2012-11-01	24.2
2012-12-01	24
2013-01-01	24.4
2013-02-01	24.4
2013-03-01	24.5
2013-04-01	24.5
2013-05-01	24.5
2013-06-01	24.5
2013-07-01	24.5
2013-08-01	24.7
2013-09-01	24.3
2013-10-01	24.7
2013-11-01	24.8
2013-12-01	24.6
2014-01-01	24.7
2014-02-01	24.9
2014-03-01	25.2
2014-04-01	25.1
2014-05-01	25.4
2014-06-01	25.3
2014-07-01	25.3
2014-08-01	25.5
2014-09-01	25.1
2014-10-01	25.1
2014-11-01	25.1
2014-12-01	24.8
2015-01-01	25.1
2015-02-01	25
2015-03-01	25.2
2015-04-01	25
2015-05-01	25.3
2015-06-01	25.2
2015-07-01	25.1
2015-08-01	25.1
2015-09-01	25
2015-10-01	25.1
2015-11-01	25
2015-12-01	24.8
2016-01-01	25.1
2016-02-01	25.2
2016-03-01	25.2
2016-04-01	25
2016-05-01	25.3
2016-06-01	25.2
2016-07-01	25.2
2016-08-01	25.1
2016-09-01	25
2016-10-01	25
2016-11-01	25.1
2016-12-01	25
2017-01-01	25.1
2017-02-01	25.1
2017-03-01	25.2
2017-04-01	25.3
2017-05-01	25.3
2017-06-01	25.1
2017-07-01	25.4
2017-08-01	25.3
2017-09-01	25.3
2017-10-01	25.3
2017-11-01	25.2
2017-12-01	25
